# Supplementary material for: Hydrogen generation by coupling methanol steam reforming with metal hydride hydrolysis
Source: Royal Society of Chemistry journal article supplement (doi:10.1039/d3cc01454a), 2023-01-01
Supplement: d3cc01454a6.pdf [file d3cc01454a6.pdf]

## Supplementary Information

### **Hydrogen generation by coupling methanol steam reforming with metal hydride hydrolysis**

Kuerbangnisha Kadeer<sup>a</sup>, Xingguo Li<sup>a</sup>, Jie Zheng<sup>\*a</sup>

Beijing National Laboratory for Molecular Sciences (BNLMS), College of Chemistry and Molecular  
Engineering, Peking University, Beijing 100871, China

## 1. Experiments

CaH<sub>2</sub> (Shanghai Titan Scientific Co., Ltd, >97%) and CuO (Beijing Beihua Fine Chemicals Co., Ltd, 99.0%) in the powder form are mixed with different molar ratios by ball milling (Fritsch Pulverisette 5) under Ar atmosphere. Other mixtures were prepared in a similar process. The materials are confirmed by powder X-ray diffraction (XRD, PANalytical X'Pert3 Powder, Cu K $\alpha$ ), scanning electron microscope (SEM, Hitachi S4800) with an energy dispersive X-ray spectrometer (EDX), X-ray photoelectron microscopy (XPS, Axis Ultra, Kratos, Al K $\alpha$  radiation) and Fourier transformed infrared (FT-IR) spectroscopy (Bruker Tensor 27).

The hydrogen generation performance is measured in a 50 mL stainless steel autoclave (SLM 50, Beijing Century Senlang Co., Ltd.) with a high precision pressure gauge (accuracy 0.01 MPa, L61K, Hong Kong Huibang Technology Co., Ltd) and a gas flowmeter (50 mL/min, D07, Beijing Seven Star Flow Co., Ltd.). In a typical measurement, the CaH<sub>2</sub>/CuO composite and a 10 mL crucible containing a CH<sub>3</sub>OH-H<sub>2</sub>O mixture is loaded into the autoclave. After purging with high purity Ar three times, the autoclave is sealed and is heated to 150-250 °C. CH<sub>3</sub>OH and H<sub>2</sub>O are vaporized and react with the solid and the pressure of the autoclave increases due to the formation of gaseous products. After 180 min, the autoclave is allowed to cool down to room temperature. The total amount of gas is determined by the pressure of the autoclave, which has been previously calibrated. The gas composition is analyzed by gas chromatography (GC7900, China). The H<sub>2</sub> yield is calculated using the total amount of gas times the H<sub>2</sub> purity from gas chromatography analysis.

To evaluation of the contribution of hydrolysis and methanol steam reforming in the H<sub>2</sub> generation, parallel experiments in the same setup by using pure hydrides (CaH<sub>2</sub> or MgH<sub>2</sub>) and H<sub>2</sub>O are carried out. The H<sub>2</sub> yield and purity is determined by the same method as noted above.

## 2. Estimation of the equilibrium CO partial pressure

The thermodynamic data of the matters involved in the calculation is retrieved from Ref 1<sup>1</sup>. For estimation, the reaction enthalpy  $\Delta_r H_m^\circ$  and entropy  $\Delta_r S_m^\circ$  values are regarded as temperature invariant within the experimental temperature range. The Gibbs free energy change of the reaction  $\Delta_r G_m^\circ(T)$  and equilibrium constant  $K^\circ(T)$  are calculated using:

$$\Delta_r G_m^\circ(T) = \Delta_r H_m^\circ - T \Delta_r S_m^\circ$$

$$K^\circ(T) = e^{-\Delta_r G_m^\circ(T)/RT}$$

The results are summarized in [Table S7](#).

In the calculation, we assume that the reaction yields the same H<sub>2</sub> partial pressure 3 MPa. To calculate the equilibrium CO partial pressure in MSR using catalyst supported on non-CO<sub>2</sub> absorbing substrates, we start with a mixture gas of H<sub>2</sub>: CO<sub>2</sub>=3:1 in molar ratio (Here we assume full conversion of the stoichiometric CH<sub>3</sub>OH and H<sub>2</sub>O in the MSR to simplify the estimation). Thus, the CO pressure is determined by the equilibrium of the water-gas shift reaction with initial state p(H<sub>2</sub>) = 3 MPa and p(CO<sub>2</sub>)=1 MPa.

When CO<sub>2</sub> is absorbed to yield CaCO<sub>3</sub>, the CO<sub>2</sub> partial pressure is determined by the reaction CaCO<sub>3</sub> ↔ CaO + CO<sub>2</sub>, which is 2.95×10<sup>-5</sup> MPa at 250°C. Thus, the initial state is p(H<sub>2</sub>) = 3 MPa and p(CO<sub>2</sub>) = 2.95×10<sup>-5</sup> MPa.

The results are summarized in [Table S7](#).

### 3. Supplementary figures and tables

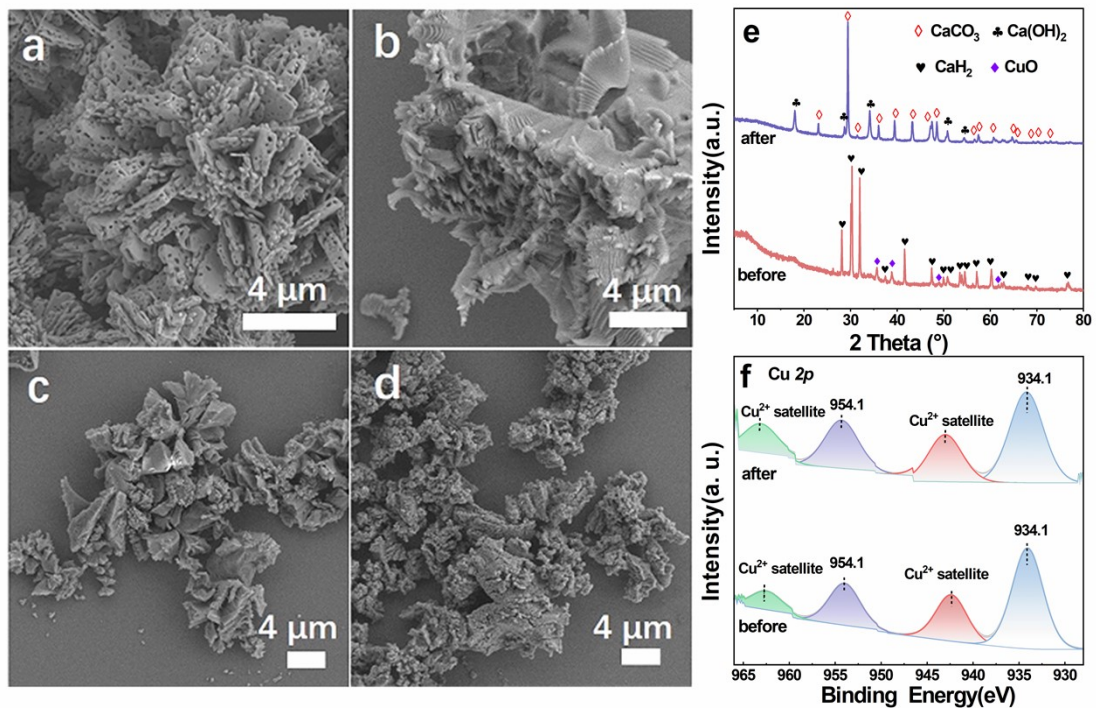

**Fig.S1** SEM images of (a) CuO, (b) CaH<sub>2</sub>, (c) CaH<sub>2</sub>/CuO composite and (d) product of CaH<sub>2</sub>/CuO after the coupled reaction; (e) XRD and (f) XPS spectrum of CaH<sub>2</sub>/CuO composite before and after the coupled reaction.

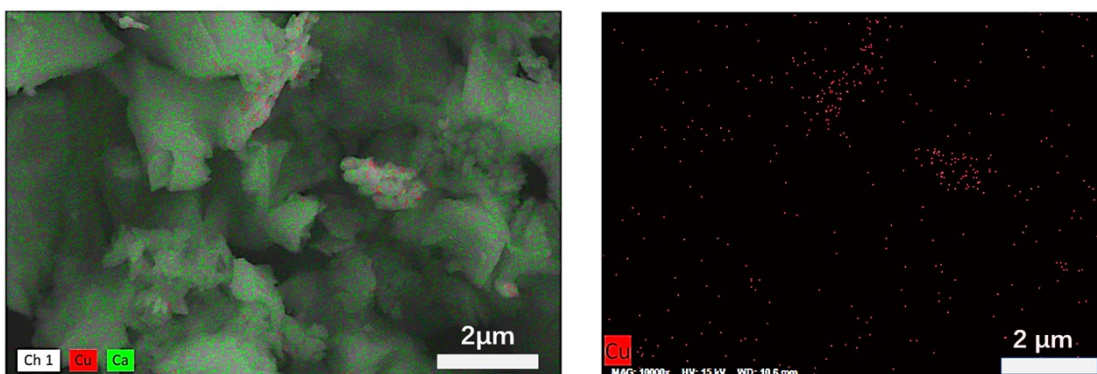

Fig. S2 Element mapping of the CaH<sub>2</sub>-CuO composite (mass ratio CaH<sub>2</sub>:CuO=10:1) prepared by ball milling before reaction.

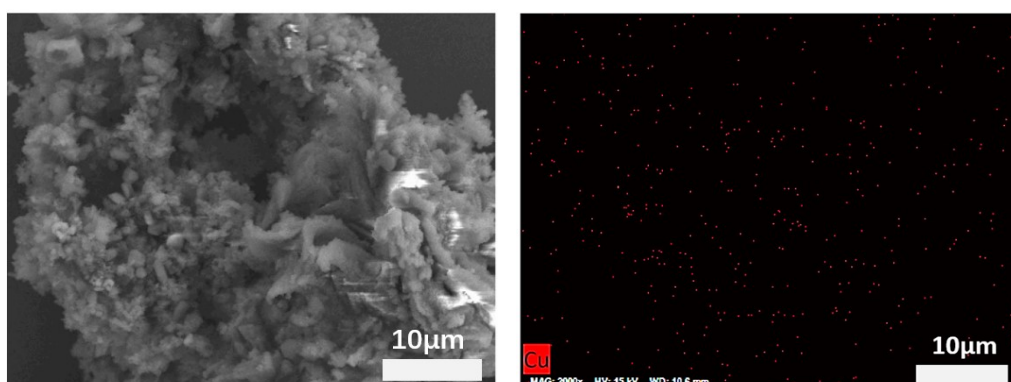

Fig. S3 Element mapping of the solid product of the CaH<sub>2</sub>-CuO composite (mass ratio CaH<sub>2</sub>:CuO=10:1) after coupling.

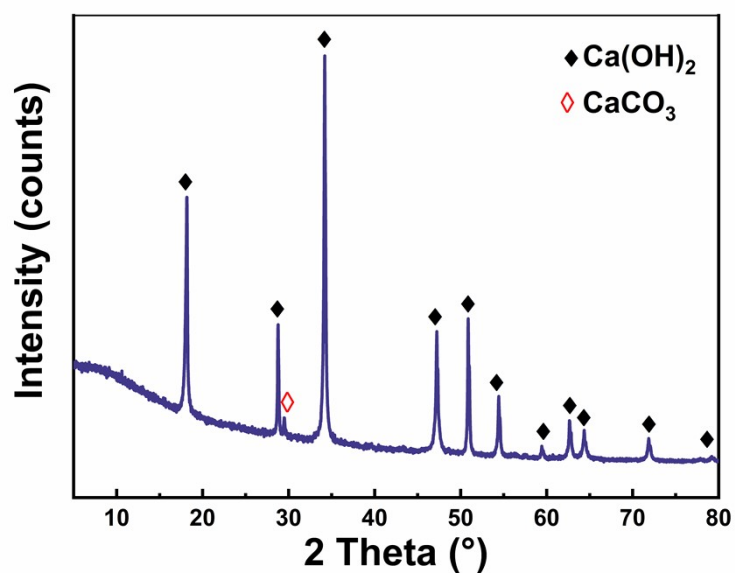

Fig. S4 XRD pattern of the product of pure CaH<sub>2</sub> (without adding CuO) after the coupled reaction

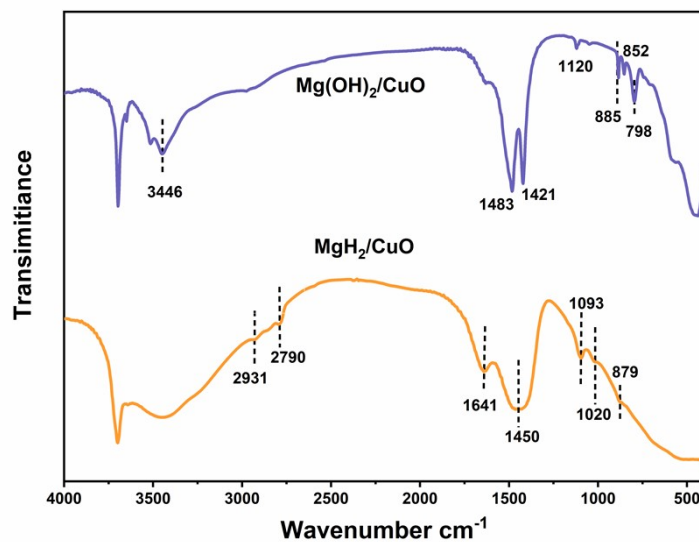

Fig. S5 IR spectrum of the product of the Mg(OH)<sub>2</sub>-CuO and MgH<sub>2</sub>-CuO composites after the coupled reaction. Peaks for MgCO<sub>3</sub>·3H<sub>2</sub>O: 850 cm<sup>-1</sup>, 1105 cm<sup>-1</sup>, 1485 cm<sup>-1</sup>, 1420 cm<sup>-1</sup>.

**Table S1.** Experimental details of H<sub>2</sub> generation by coupling methanol steam reforming with hydrolysis of CaH<sub>2</sub>.

| Entry | $x$ | $n_{\text{CaH}_2}$<br>/ mol | $n_{\text{CH}_3\text{OH}}$<br>/ mol | $n_{\text{H}_2\text{O}}$<br>/ mol | $V(\text{H}_2)$<br>/ mL | $V_{\text{m}}(\text{H}_2)$<br>/ mL | $V_{\text{h}}(\text{H}_2)$<br>/ mL | CO<br>/ % | CH <sub>4</sub><br>/ % | CO <sub>2</sub><br>/ % |
|-------|-----|-----------------------------|-------------------------------------|-----------------------------------|-------------------------|------------------------------------|------------------------------------|-----------|------------------------|------------------------|
| 1     | 0   | 0                           | 0.010                               | 0.010                             | 301                     | 301                                | 0                                  | 0.60      | 0.60                   | 23.80                  |
| 2     | 1/2 | 0.010                       | 0.010                               | 0.030                             | 1188                    | 756                                | 432                                | 0.00      | 0.08                   | 6.64                   |
| 3     | 3/5 | 0.015                       | 0.010                               | 0.040                             | 1361                    | 737                                | 624                                | 0.00      | 0.00                   | 0.00                   |
| 4     | 2/3 | 0.020                       | 0.010                               | 0.050                             | 1681                    | 761                                | 920                                | 0.00      | 0.00                   | 0.00                   |
| 5     | 3/4 | 0.030                       | 0.010                               | 0.070                             | 2194                    | 782                                | 1412                               | 0.00      | 0.00                   | 0.00                   |
| 6     | 1   | 0.010                       | 0                                   | 0.020                             | 432                     | 0                                  | 432                                | 0.00      | 0.00                   | 0.00                   |

The amount of CuO is 0.042 g and the reaction temperature is 250°C in all the experiments. In Entry 1, 0.01 mol CaCO<sub>3</sub> is used as the support for CuO.

$x$ : fraction of hydrolysis in the coupled reaction, determined by  $x = n(\text{CaH}_2) / (n(\text{CaH}_2) + n(\text{CH}_3\text{OH}))$ .

$V_{\text{m}}(\text{H}_2)$ : Volume of H<sub>2</sub> from methanol steam reforming at 298 K, 101 kPa.

$V_{\text{h}}(\text{H}_2)$ : Volume of H<sub>2</sub> from hydrolysis of CaH<sub>2</sub> at 298 K, 101 kPa.

**Table S2** Experimental details, key results and calculation details for coupled reactions with different fraction of hydrolysis  $x$  (Data for Fig. 2 in the main text)<sup>a</sup>

| Term                                     | Note for the term                                                      | Fraction of hydrolysis in the coupled reaction $x$ |         |         |         |         |        |
|------------------------------------------|------------------------------------------------------------------------|----------------------------------------------------|---------|---------|---------|---------|--------|
|                                          |                                                                        | $x=0$                                              | $x=1/2$ | $x=3/5$ | $x=2/3$ | $x=3/4$ | $x=1$  |
| $m(\text{CuO})/\text{g}$                 | Amount of reactants                                                    | 0.042 <sup>b</sup>                                 | 0.042   | 0.042   | 0.042   | 0.042   | 0      |
| $n(\text{CaH}_2)/\text{mol}$             |                                                                        | 0                                                  | 0.01    | 0.015   | 0.02    | 0.03    | 0.01   |
| $n(\text{CH}_3\text{OH})/\text{mol}$     |                                                                        | 0.01                                               | 0.01    | 0.01    | 0.01    | 0.01    | 0      |
| $n(\text{H}_2\text{O})/\text{mol}$       |                                                                        | 0.01                                               | 0.03    | 0.04    | 0.05    | 0.07    | 0.02   |
| $V(\text{H}_2)_{\text{exp}}/\text{mL}^c$ | Experimental total $\text{H}_2$ volume at 298 K and 101 kPa            | 301                                                | 1188    | 1361    | 1681    | 2194    | 432    |
| $V_h/\text{mL}$                          | $\text{H}_2$ volume from hydrolysis at 298 K and 101 kPa               | 0                                                  | 432     | 624     | 920     | 1412    | 432    |
| $V_m/\text{ml}$                          | $\text{H}_2$ volume from methanol steam reforming at 298 K and 101 kPa | 301                                                | 756     | 737     | 761     | 782     | 0      |
| $n(\text{H}_2)_{\text{exp}}/\text{mol}$  | Experimental total $\text{H}_2$ moles                                  | 0.012                                              | 0.048   | 0.055   | 0.068   | 0.089   | 0.018  |
| $\rho_{\text{H, exp}}/\%$ <sup>d</sup>   | Experimental H density                                                 | 1.60                                               | 7.38    | 6.53    | 6.56    | 6.25    | 4.54   |
| $\rho_{\text{H, h}}/\%$                  | Experimental H density from hydrolysis                                 | 0                                                  | 2.68    | 2.99    | 3.59    | 4.02    | 4.54   |
| $\rho_{\text{H, m}}/\%$                  | Experimental H density from methanol steam reforming                   | 1.60                                               | 4.69    | 3.53    | 2.97    | 2.23    | 0      |
| $n(\text{H}_2)_{\text{theo}}/\text{mol}$ | Theoretical total $\text{H}_2$ moles                                   | 0.03                                               | 0.05    | 0.06    | 0.07    | 0.09    | 0.02   |
| $V(\text{H}_2)_{\text{theo}}/\text{mL}$  | Theoretical total $\text{H}_2$ volume at 298 K and 101 kPa             | 736                                                | 1227    | 1473    | 1718    | 2209    | 491    |
| $\rho_{\text{H, theo}}/\%$               | Theoretical H density                                                  | 3.92                                               | 7.62    | 7.06    | 6.71    | 6.29    | 5.16   |
| $\text{H}_2(\%)$                         | Volume percentage of gases in the products                             | 75.00                                              | 93.28   | 100.00  | 100.00  | 100.00  | 100.00 |
| $\text{CO}(\%)$                          |                                                                        | 0.60                                               | 0.00    | 0.00    | 0.00    | 0.00    | 0.00   |
| $\text{CH}_4(\%)$                        |                                                                        | 0.60                                               | 0.08    | 0.00    | 0.00    | 0.00    | 0.00   |
| $\text{CO}_2(\%)$                        |                                                                        | 23.80                                              | 6.64    | 0.00    | 0.00    | 0.00    | 0.00   |

Note

- The reaction is carried out at 250 °C.  $x$  is the fraction of hydrolysis in the coupled reaction, defined as  $x=n(\text{CaH}_2)/(n(\text{CaH}_2) + n(\text{CH}_3\text{OH}))$
- For  $x=0$  (conventional methanol steam reforming), 0.042 g CuO is loaded on 0.010 mol  $\text{CaCO}_3$
- The experiment  $\text{H}_2$  volume is calculated by the total gas volume at 298 K times the  $\text{H}_2$  volume percentage from gas chromatography analysis.
- The H density (both experimental and theoretical) is calculated based on all the reactants ( $\text{CaH}_2$ , CuO,  $\text{CH}_3\text{OH}$  and  $\text{H}_2\text{O}$ )

**Table S3** Experimental details, key results and calculation details for coupled reactions on CuO supported on different substrates (Data for Fig. 4 in the main text)<sup>a</sup>

| Term                                                 | Note for the term                                                        | Substrates for CuO             |                   |                     |                     |                  |                  |
|------------------------------------------------------|--------------------------------------------------------------------------|--------------------------------|-------------------|---------------------|---------------------|------------------|------------------|
|                                                      |                                                                          | Al <sub>2</sub> O <sub>3</sub> | CaCO <sub>3</sub> | Mg(OH) <sub>2</sub> | Ca(OH) <sub>2</sub> | MgH <sub>2</sub> | CaH <sub>2</sub> |
| <b>m(CuO)/g</b>                                      | Amount of reactants                                                      | 0.042                          | 0.042             | 0.042               | 0.042               | 0.042            | 0.042            |
| <b>n(CaH<sub>2</sub>)/mol</b>                        |                                                                          | 0.010                          | 0.010             | 0.010               | 0.010               | 0.010            | 0.010            |
| <b>n(CH<sub>3</sub>OH)/mol</b>                       |                                                                          | 0.010                          | 0.010             | 0.010               | 0.010               | 0.010            | 0.010            |
| <b>n(H<sub>2</sub>O)/mol</b>                         |                                                                          | 0.010                          | 0.010             | 0.010               | 0.010               | 0.030            | 0.030            |
| <b>V(H<sub>2</sub>)<sub>exp</sub>/mL<sup>b</sup></b> | Experimental total H <sub>2</sub> volume at 298 K and 101 kPa            | 144                            | 301               | 76                  | 674                 | 799              | 1188             |
| <b>V<sub>h</sub>/mL</b>                              | H <sub>2</sub> volume from hydrolysis at 298 K and 101 kPa               | 0                              | 0                 | 0                   | 0                   | 440              | 432              |
| <b>V<sub>m</sub>/ml</b>                              | H <sub>2</sub> volume from methanol steam reforming at 298 K and 101 kPa | 144                            | 301               | 76                  | 674                 | 359              | 756              |
| <b>n(H<sub>2</sub>)<sub>exp</sub>/mol</b>            | Experimental total H <sub>2</sub> moles                                  | 0.006                          | 0.012             | 0.003               | 0.027               | 0.033            | 0.048            |
| <b>ρ<sub>H, exp</sub>/%</b> <sup>c</sup>             | Experimental H density                                                   | 0.76                           | 1.60              | 0.55                | 4.31                | 5.63             | 7.38             |
| <b>ρ<sub>H, h</sub>/%</b>                            | Experimental H density from hydrolysis                                   | 0                              | 0                 | 0                   | 0                   | 3.10             | 2.68             |
| <b>ρ<sub>H, m</sub>/%</b>                            | Experimental H density from methanol steam reforming                     | 0.76                           | 1.60              | 0.55                | 4.31                | 2.53             | 4.69             |
| <b>n(H<sub>2</sub>)<sub>theo</sub>/mol</b>           | Theoretical total H <sub>2</sub> moles                                   | 0.03                           | 0.03              | 0.03                | 0.03                | 0.05             | 0.05             |
| <b>V(H<sub>2</sub>)<sub>theo</sub>/mL</b>            | Theoretical total H <sub>2</sub> volume at 298 K and 101 kPa             | 736                            | 736               | 736                 | 736                 | 1227             | 1227             |
| <b>ρ<sub>H, theo</sub>/%</b>                         | Theoretical H density                                                    | 3.87                           | 3.92              | 5.37                | 4.71                | 8.65             | 7.62             |
| <b>H<sub>2</sub>(%)</b>                              | Volume percentage of gases in the products                               | 73.88                          | 75.00             | 76.20               | 95.77               | 89.55            | 93.28            |
| <b>CO(%)</b>                                         |                                                                          | 0.72                           | 0.60              | 0.00                | 0.00                | 0.00             | 0.00             |
| <b>CH<sub>4</sub>(%)</b>                             |                                                                          | 0.13                           | 0.60              | 0.00                | 0.00                | 0.12             | 0.08             |
| <b>CO<sub>2</sub>(%)</b>                             |                                                                          | 25.28                          | 23.80             | 23.80               | 4.23                | 10.33            | 6.64             |

Note:

- The reaction is carried out at 250 °C. The mass ratio of CuO/substrate is 1/10. The molar ratio of H<sub>2</sub>O/CH<sub>3</sub>OH is 3 (i.e. x=1/2) for the hydrides and 1 for other substrates.
- The experiment H<sub>2</sub> volume is calculated by the total gas volume at 298 K times the H<sub>2</sub> volume percentage from gas chromatography analysis.
- The H density (both experimental and theoretical) is calculated based on all the reactants (CaH<sub>2</sub>, CuO, CH<sub>3</sub>OH and H<sub>2</sub>O)



**Table S4** Experimental details, key results and calculation details for coupled reactions on CuO-CaH<sub>2</sub> composite at different temperature (Data for Fig. 5 in the main text)<sup>a</sup>

| Term                                                 | Note for the term                                                        | Reaction temperature/°C |       |       |       |       |
|------------------------------------------------------|--------------------------------------------------------------------------|-------------------------|-------|-------|-------|-------|
|                                                      |                                                                          | 150                     | 180   | 200   | 220   | 250   |
| <b>m(CuO)/g</b>                                      | Amount of reactants                                                      | 0.042                   | 0.042 | 0.042 | 0.042 | 0.042 |
| <b>n(CaH<sub>2</sub>)/mol</b>                        |                                                                          | 0.020                   | 0.020 | 0.020 | 0.020 | 0.020 |
| <b>n(CH<sub>3</sub>OH)/mol</b>                       |                                                                          | 0.010                   | 0.010 | 0.010 | 0.010 | 0.010 |
| <b>n(H<sub>2</sub>O)/mol</b>                         |                                                                          | 0.050                   | 0.050 | 0.050 | 0.050 | 0.050 |
| <b>V(H<sub>2</sub>)<sub>exp</sub>/mL<sup>b</sup></b> | Experimental total H <sub>2</sub> volume at 298 K and 101 kPa            | 936                     | 1037  | 1089  | 1608  | 1681  |
| <b>V<sub>h</sub>/mL</b>                              | H <sub>2</sub> volume from hydrolysis at 298 K and 101 kPa               | 920                     | 920   | 920   | 920   | 920   |
| <b>V<sub>m</sub>/ml</b>                              | H <sub>2</sub> volume from methanol steam reforming at 298 K and 101 kPa | 16                      | 117   | 169   | 687   | 761   |
| <b>n(H<sub>2</sub>)<sub>exp</sub>/mol</b>            | Experimental total H <sub>2</sub> moles                                  | 0.038                   | 0.042 | 0.044 | 0.066 | 0.068 |
| <b>ρ<sub>H, exp</sub>/%</b> <sup>c</sup>             | Experimental H density                                                   | 3.65                    | 4.05  | 4.25  | 6.27  | 6.56  |
| <b>ρ<sub>H, h</sub>/%</b>                            | Experimental H density from hydrolysis                                   | 3.59                    | 3.59  | 3.59  | 3.59  | 3.59  |
| <b>ρ<sub>H, m</sub>/%</b>                            | Experimental H density from methanol steam reforming                     | 0.06                    | 0.46  | 0.66  | 2.68  | 2.97  |
| <b>n(H<sub>2</sub>)<sub>theo</sub>/mol</b>           | Theoretical total H <sub>2</sub> moles                                   | 0.07                    | 0.07  | 0.07  | 0.07  | 0.07  |
| <b>V(H<sub>2</sub>)<sub>theo</sub>/mL</b>            | Theoretical total H <sub>2</sub> volume at 298 K and 101 kPa             | 1718                    | 1718  | 1718  | 1718  | 1718  |
| <b>ρ<sub>H, theo</sub>/%</b>                         | Theoretical H density                                                    | 6.71                    | 6.71  | 6.71  | 6.71  | 6.71  |
| <b>H<sub>2</sub>(%)</b>                              | Volume percentage of gases in the products                               | 100                     | 100   | 100   | 100   | 100   |
| <b>CO(%)</b>                                         |                                                                          | 0                       | 0     | 0     | 0     | 0     |
| <b>CH<sub>4</sub>(%)</b>                             |                                                                          | 0                       | 0     | 0     | 0     | 0     |
| <b>CO<sub>2</sub>(%)</b>                             |                                                                          | 0                       | 0     | 0     | 0     | 0     |

Note:

- The amount of reactants: CaH<sub>2</sub> 0.020 mol, CuO: 0.042 g, CH<sub>3</sub>OH 0.010 mol, H<sub>2</sub>O 0.050 mol, i.e. x=2/3.
- The experiment H<sub>2</sub> volume is calculated by the total gas volume at 298 K times the H<sub>2</sub> volume percentage from gas chromatography analysis.
- The H density (both experimental and theoretical) is calculated based on all the reactants (CaH<sub>2</sub>, CuO, CH<sub>3</sub>OH and H<sub>2</sub>O)

**Table S5** List of Enthalpies and Entropies of the related substances.

| Substance         | Physical state | $\Delta_f H_m^\ominus$ (kJ/mol) | $S_m^\ominus$ (J/mol K) |
|-------------------|----------------|---------------------------------|-------------------------|
| CO                | g              | -110.53                         | 197.67                  |
| H <sub>2</sub> O  | g              | -241.82                         | 188.72                  |
| CO <sub>2</sub>   | g              | -393.51                         | 213.64                  |
| H <sub>2</sub>    | g              | 0                               | 130.59                  |
| CaCO <sub>3</sub> | c              | -1207.60                        | 91.70                   |
| CaO               | c              | -634.92                         | 38.10                   |

**Table S6** Thermal and kinetic equilibrium calculation results.

|                                                      | $\Delta_r H_m^\ominus(298.15K)$<br>/(kJ/mol) | $\Delta_r S_m^\ominus(298.15K)$<br>/ (J/mol K) | $\Delta_r G_m^\ominus(523.15K)$<br>/(J/mol) | $K^\ominus(523.15K)$   |
|------------------------------------------------------|----------------------------------------------|------------------------------------------------|---------------------------------------------|------------------------|
| H <sub>2</sub> +CO <sub>2</sub> =CO+H <sub>2</sub> O | 41.16                                        | 42.16                                          | 1.91*10 <sup>4</sup>                        | 1.23*10 <sup>-2</sup>  |
| CaCO <sub>3</sub> =CaO+CO <sub>2</sub>               | 179.17                                       | 160.04                                         | 9.54*10 <sup>4</sup>                        | 2.95*10 <sup>-10</sup> |

**Table S7** List of the partial pressure calculation results.

| MSR on conventional Cu based catalyst              |                |                        |                       |                       |
|----------------------------------------------------|----------------|------------------------|-----------------------|-----------------------|
|                                                    | H <sub>2</sub> | CO <sub>2</sub>        | CO                    | H <sub>2</sub> O      |
| Initial partial pressure/MPa                       | 3              | 1                      | 0                     | 0                     |
| Equilibrium partial pressure/MPa                   | 2.83           | 0.83                   | 0.17                  | 0.17                  |
| Coupled MSR and hydrolysis on CuO/CaH <sub>2</sub> |                |                        |                       |                       |
|                                                    | H <sub>2</sub> | CO <sub>2</sub>        | CO                    | H <sub>2</sub> O      |
| Initial partial pressure/MPa                       | 3              | 2.95*10 <sup>-11</sup> | 0                     | 0                     |
| Equilibrium partial pressure/MPa                   | 3              | 2.95*10 <sup>-11</sup> | 1.04*10 <sup>-6</sup> | 1.04*10 <sup>-6</sup> |

## Reference

1. A. P. Miller, *Lange's Handbook of Chemistry*, 1941.
