# Supplementary figures and images for: Hydrogen generation by coupling methanol steam reforming with metal hydride hydrolysis
Source: Royal Society of Chemistry journal article supplement (doi:10.1039/d3cc01454a), 2023-01-01

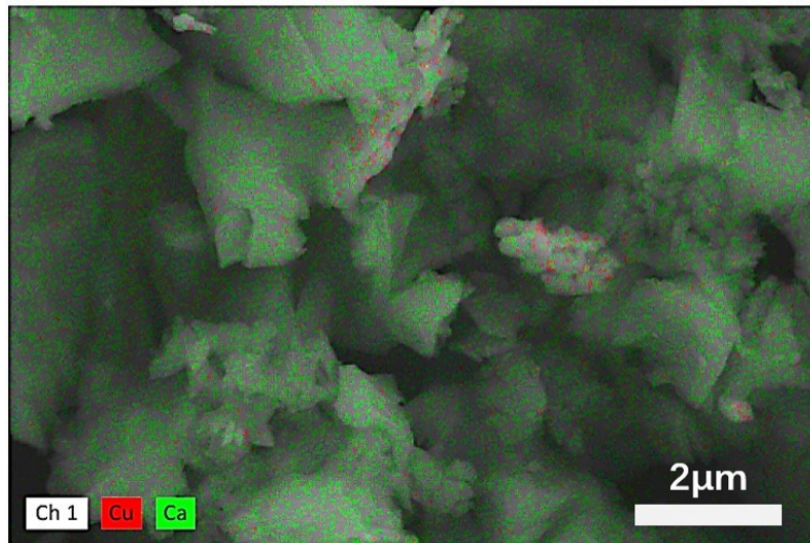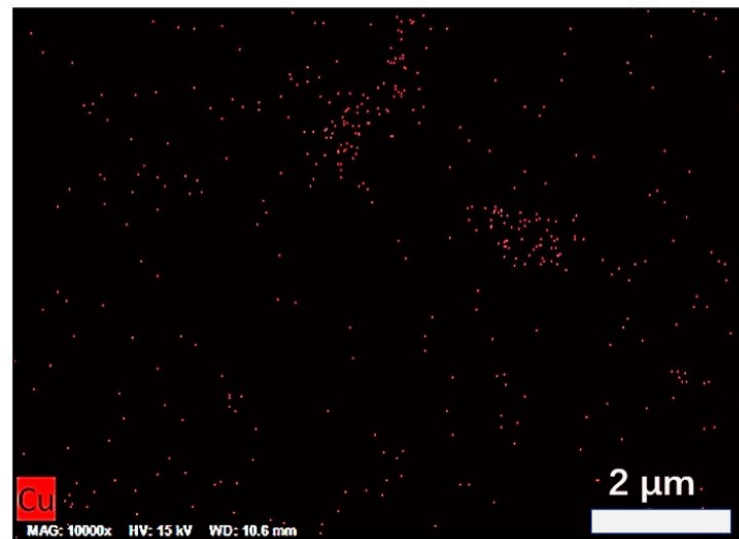

Supplement: d3cc01454a2.pdf [file d3cc01454a2.pdf]

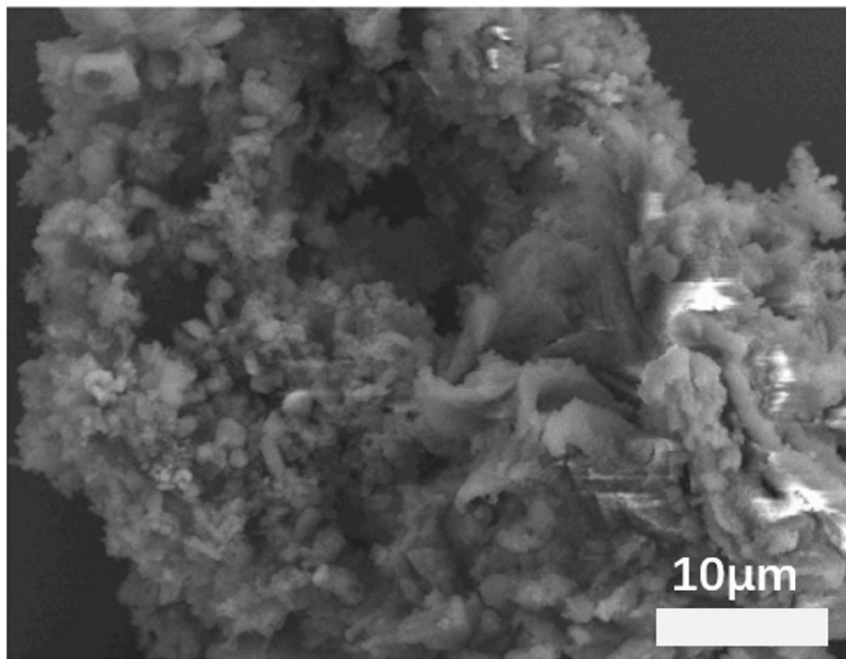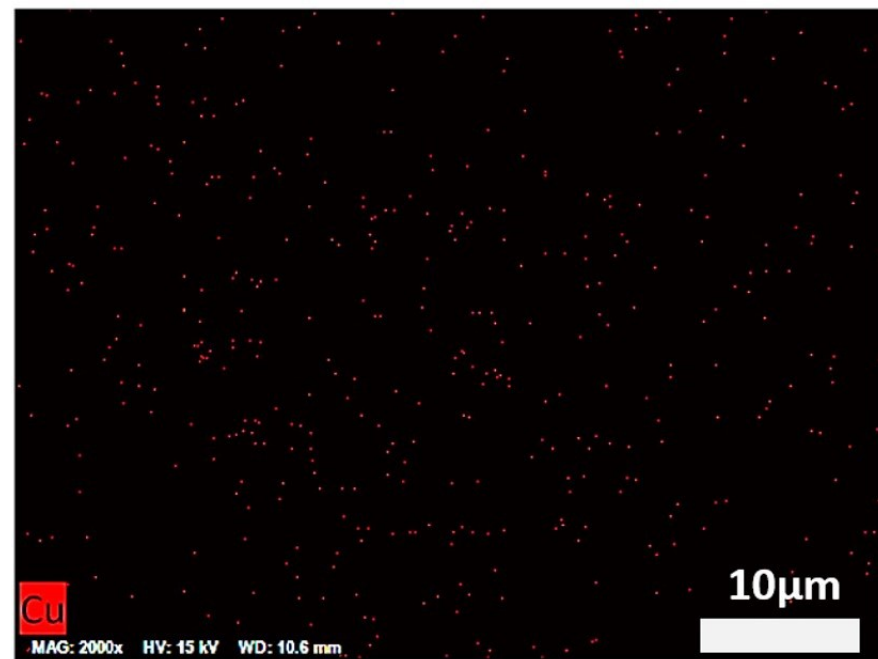

Supplement: d3cc01454a3.pdf [file d3cc01454a3.pdf]

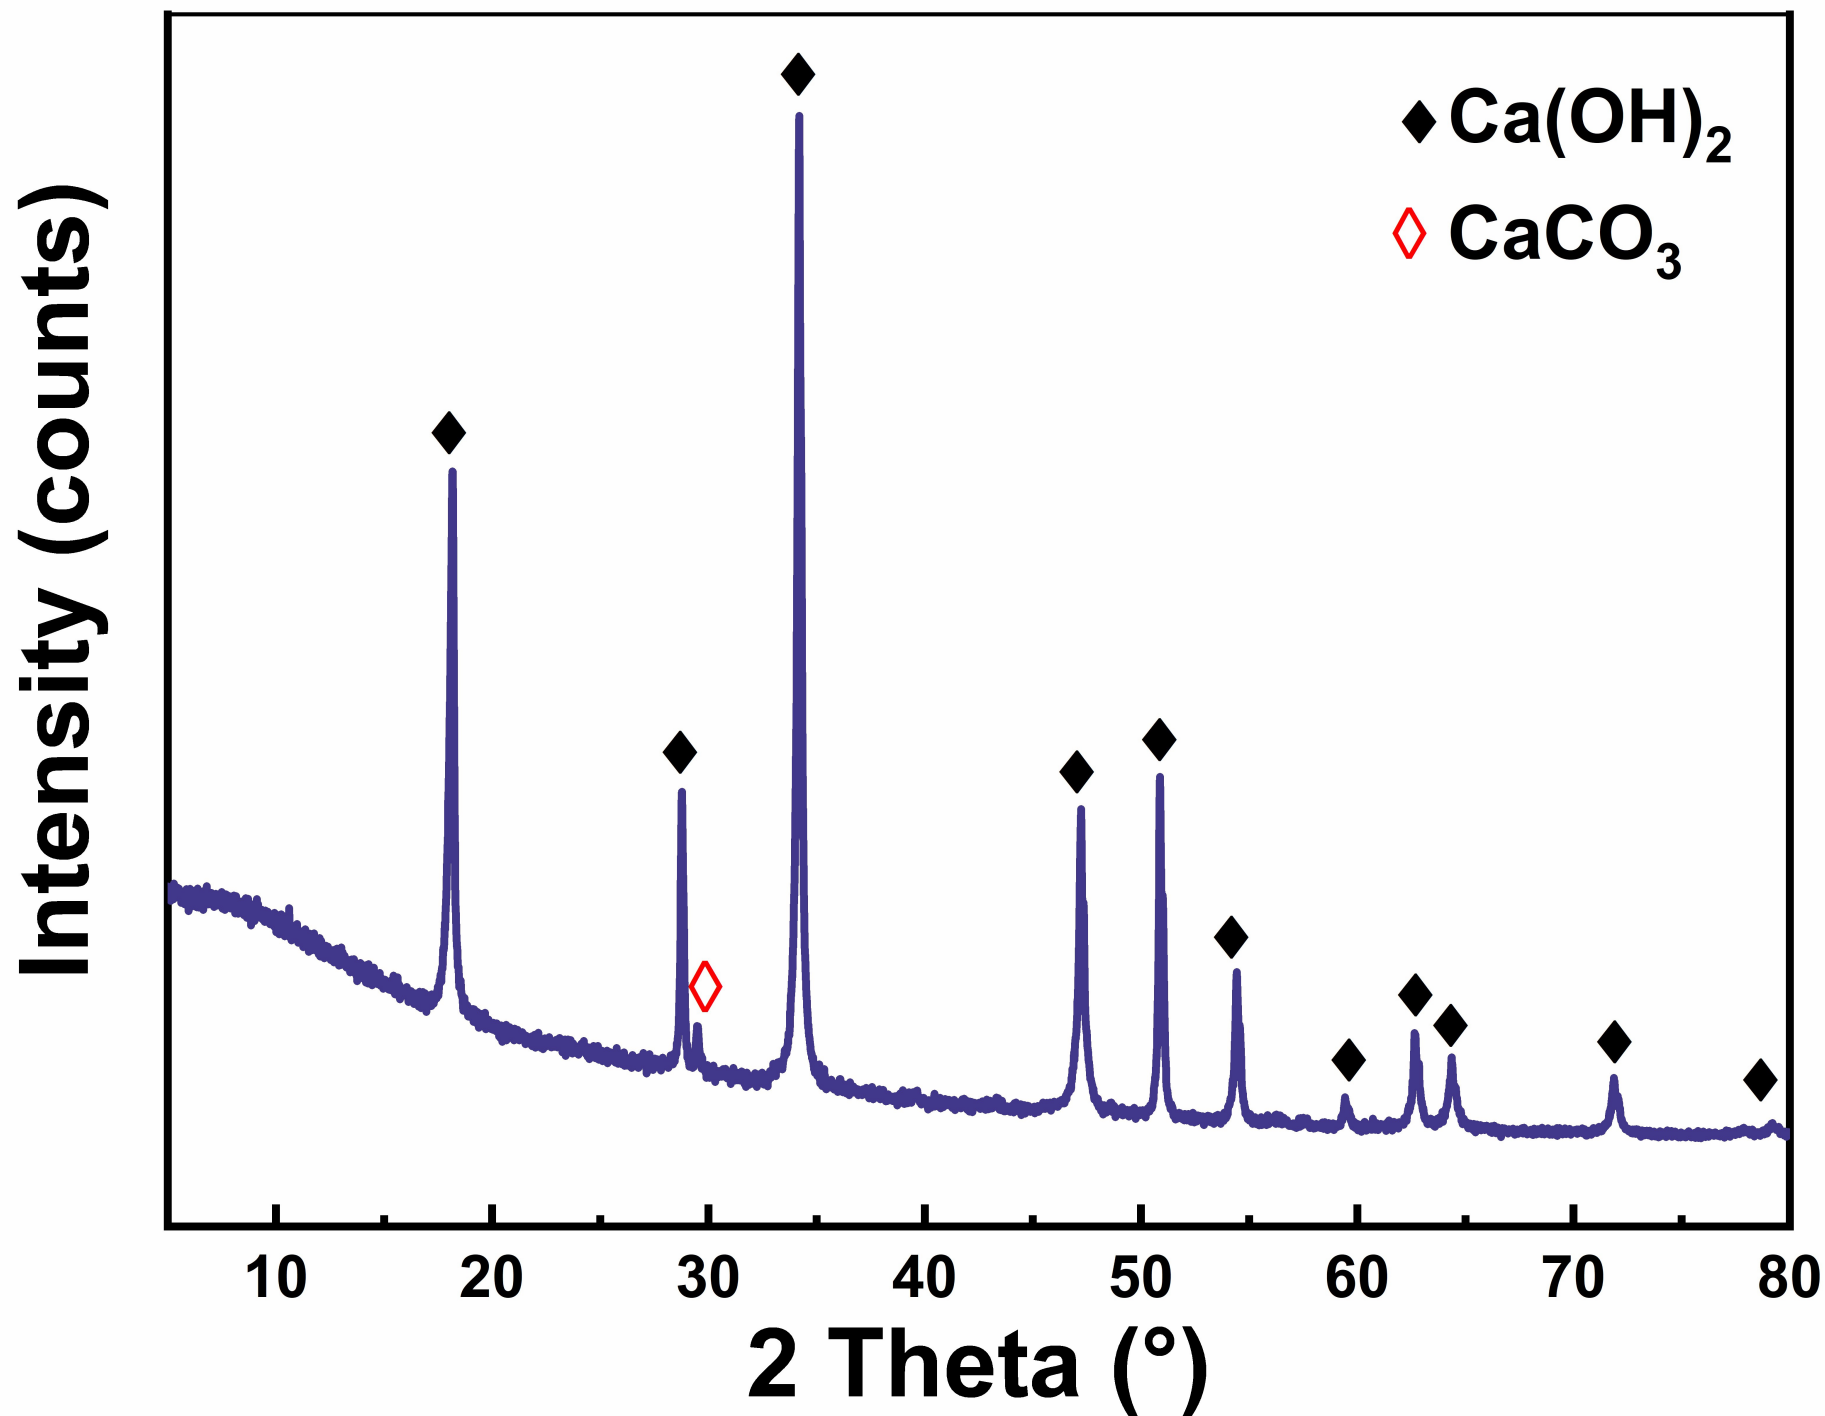

Supplement: d3cc01454a4.pdf [file d3cc01454a4.pdf]

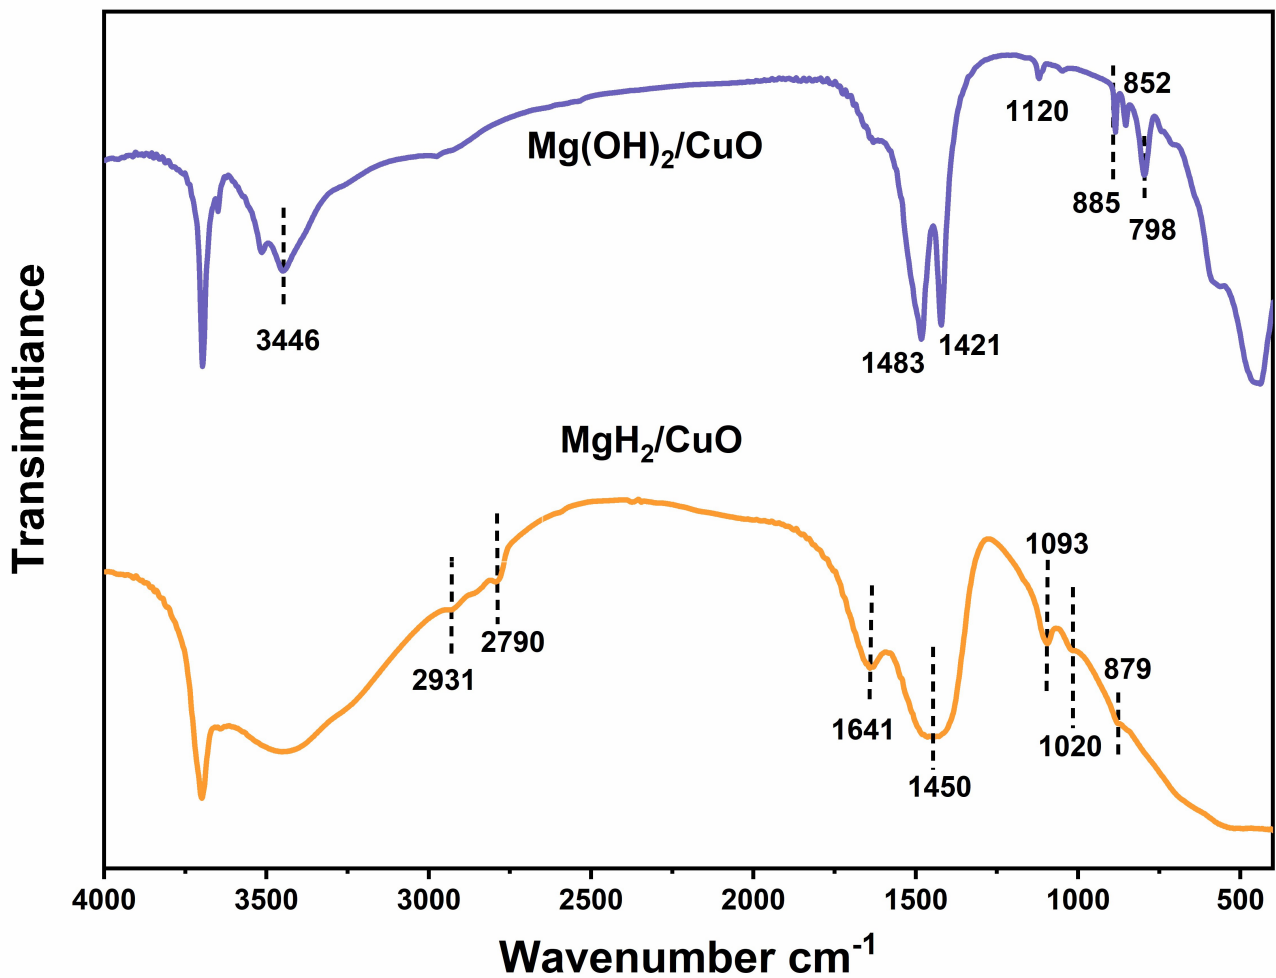

Supplement: d3cc01454a5.pdf [file d3cc01454a5.pdf]
